# Supplementary material for: Human Collective Intelligence under Dual Exploration-Exploitation Dilemmas
Source: PubMed Central journal article supplement (PMC3995913; doi:10.1371/journal.pone.0095789), 2014-04-22
Supplement: pone.0095789.s005.pdf [file pone.0095789.s005.pdf]

Table S1: MCMC results of the exploration probability model (equation S1)

| Parameters      | Mean  | SD   | Quantiles |       |       | Gelman-Rubin Statistics | Effective sample size |
|-----------------|-------|------|-----------|-------|-------|-------------------------|-----------------------|
|                 |       |      | 2.5%      | 50.0% | 97.5% | median (upper C.I.)     |                       |
| $\lambda_{1,0}$ | 1.94  | 0.25 | 1.42      | 1.94  | 2.47  | 1.00 (1.01)             | 1527                  |
| $\lambda_{1,1}$ | -0.94 | 0.32 | -1.63     | -0.94 | -0.27 | 1.00 (1.01)             | 1528                  |
| $\sigma_1$      | 1.62  | 0.11 | 1.42      | 1.61  | 1.86  | 1.00 (1.00)             | 4051                  |
| $\Sigma_1$      | 0.83  | 0.19 | 0.44      | 0.83  | 1.20  | 1.00 (1.01)             | 2921                  |

The Gelman-Rubin statistic for each parameter was lower than 1.1, which means the MCMC sampling converged.
