# Supplementary material for: Human Collective Intelligence under Dual Exploration-Exploitation Dilemmas
Source: PubMed Central journal article supplement (PMC3995913; doi:10.1371/journal.pone.0095789), 2014-04-22
Supplement: pone.0095789.s006.pdf [file pone.0095789.s006.pdf]

Table S2: MCMC results of the exploration probability model (equation S2)

| Parameters      | Mean | SD   | Quantiles |       |       | Gelman-Rubin Statistics |                       |
|-----------------|------|------|-----------|-------|-------|-------------------------|-----------------------|
|                 |      |      | 2.5%      | 50.0% | 97.5% | median (upper C.I.)     | Effective sample size |
| $\lambda_{2,0}$ | 0.54 | 0.30 | -0.05     | 0.54  | 1.13  | 1.01 (1.02)             | 1675                  |
| $\lambda_{2,1}$ | 0.92 | 0.43 | 0.07      | 0.91  | 1.78  | 1.00 (1.01)             | 1959                  |
| $\sigma_2$      | 1.70 | 0.13 | 1.42      | 1.69  | 1.96  | 1.00 (1.00)             | 3611                  |
| $\Sigma_2$      | 0.80 | 0.25 | 0.28      | 0.80  | 1.31  | 1.00 (1.00)             | 2494                  |

The Gelman-Rubin statistic for each parameter was lower than 1.1, which means the MCMC sampling converged.
