# Supplementary material for: Human Collective Intelligence under Dual Exploration-Exploitation Dilemmas
Source: PubMed Central journal article supplement (PMC3995913; doi:10.1371/journal.pone.0095789), 2014-04-22
Supplement: pone.0095789.s007.pdf [file pone.0095789.s007.pdf]

Table S3: MCMC results of the causality between exploration and evaluation

|                                           | Parameters | Mean | SD    | Quantiles |       |       | Gelman-Rubin Statistics |                       |
|-------------------------------------------|------------|------|-------|-----------|-------|-------|-------------------------|-----------------------|
|                                           |            |      |       | 2.5%      | 50.0% | 97.5% | median (upper C.I.)     | Effective sample size |
| Evaluation effect model<br>(equation S3)  | $\alpha_1$ | 1.47 | 0.32  | 0.86      | 1.48  | 2.10  | 1.01 (1.03)             | 1000                  |
|                                           | $\beta_1$  | 0.42 | 0.040 | 0.34      | 0.42  | 0.50  | 1.00 (1.02)             | 1241                  |
|                                           | $\sigma_3$ | 1.93 | 0.20  | 1.57      | 1.91  | 2.38  | 1.01 (1.03)             | 1118                  |
|                                           | $\Sigma_3$ | 0.67 | 0.39  | 0.04      | 0.66  | 0.90  | 1.00 (1.01)             | 814                   |
| Exploration effect model<br>(equation S4) | $\alpha_2$ | 0.87 | 0.39  | 0.094     | 0.86  | 1.67  | 1.01 (1.02)             | 614                   |
|                                           | $\beta_2$  | 0.34 | 0.089 | 0.17      | 0.34  | 0.52  | 1.00 (1.01)             | 1167                  |
|                                           | $\sigma_4$ | 2.09 | 0.25  | 1.67      | 2.06  | 2.60  | 1.00 (1.01)             | 995                   |
|                                           | $\Sigma_4$ | 0.98 | 0.47  | 0.12      | 0.96  | 2.01  | 1.00 (1.02)             | 506                   |

The Gelman-Rubin statistic for each parameter was lower than 1.1, which means the MCMC sampling converged.
